# Supplementary material
Source: PubMed Central journal article supplement (PMC3389969)
Supplement: supp_112.140780_140780SI.pdf [file supp_112.140780_140780SI.pdf]

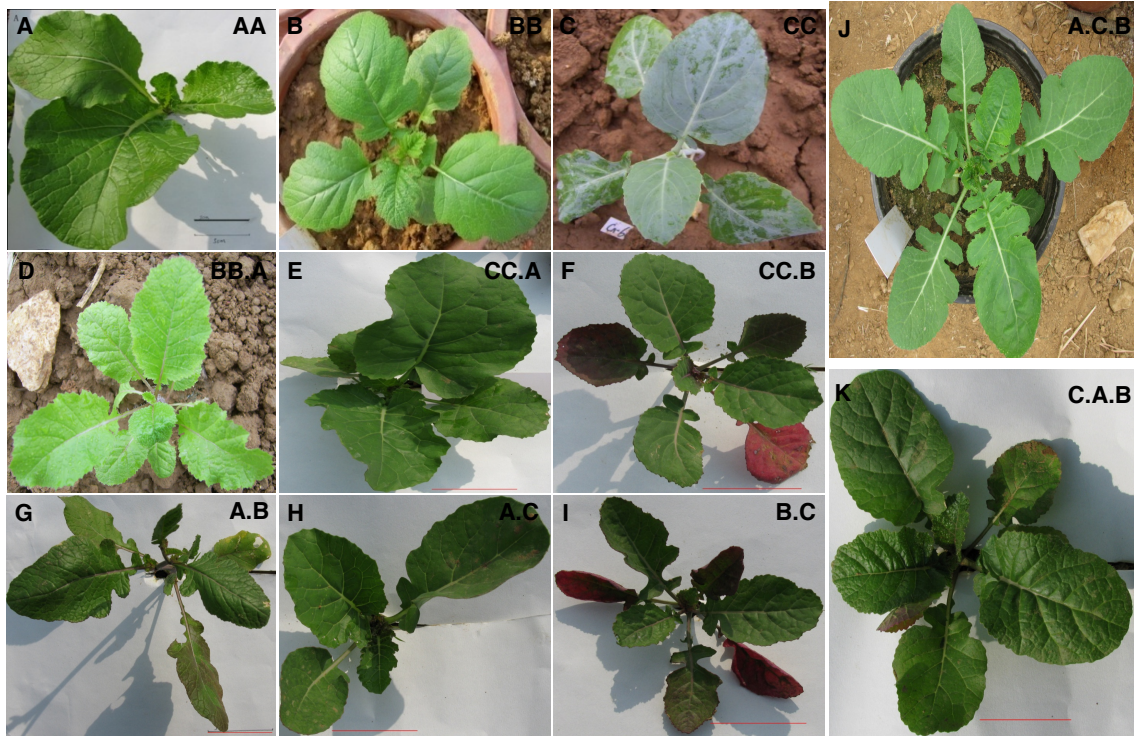

**FIGURE S1** Morphology of young hybrids and their progenitors (A-K). (A) *B. rapa* (3H120), genomes AA. (B) *B. nigra* cv. Giebra, BB. (C) *B. oleracea* var. *alboglabra* L. (ChiJielan), CC. (D) BB.A. (E) CC.A. (F) CC.B. (G) A.B. (H) A.C. (I) B.C. (J) A.C.B. (K) C.A.B. All bars, 5cm

**Table S1 Meiotic pairings in PMCs of hybrids at diakinesis and metaphase I by conventional method**

| Hybrids | Mean frequencies and Ranges |        |       |        |       |        | PMCs<br>with M<br>(%) | Total<br>PMCs | Pollen<br>fertility<br>(%) |
|---------|-----------------------------|--------|-------|--------|-------|--------|-----------------------|---------------|----------------------------|
|         | I                           |        | II    |        | III   |        |                       |               |                            |
|         | Means                       | Ranges | Means | Ranges | Means | Ranges |                       |               |                            |
| A.B     | 7.35                        | 2-16   | 4.01  | 0-8    | 0.45  | 0-2    | 44.1                  | 161           | 1.75                       |
| A.C     | 3.32                        | 1-11   | 7.51  | 4-9    | 0.22  | 0-1    | 21.95                 | 82            | 4.88                       |
| B.C     | 9.20                        | 7-15   | 1.78  | 1-5    | 0.56  | 0-2    | 60.18                 | 221           | 9.11                       |
| A.C.B   | 5.06                        | 1-18   | 10.12 | 0-13   | 0.57  | 0-3    | 55.68                 | 176           | -                          |
| BB.A    | 7.62                        | 4-12   | 8.40  | 2-10   | 0.50  | 0-2    | 45.28                 | 84            | 25.33                      |
| C.A.B   | 5.99                        | 1-11   | 9.74  | 0-12   | 0.51  | 0-1    | 50.83                 | 120           | -                          |
| CC.A    | 4.06                        | 0-13   | 11.41 | 6-14   | 0.38  | 0-1    | 37.67                 | 146           | 3.51                       |
| CC.B    | 6.49                        | 4 - 13 | 8.51  | 2 - 10 | 0.83  | 0-3    | 56.6                  | 53            | 17.56                      |

Univalent = I, bivalent = II, trivalent = III, M: multivalents

**Table S2 Means and percentages of trivalents per cell at metaphase I in hybrids revealed by FISH**

| Hybrids | Total | A-A-A   | B-B-B   | C-C-C   | A-A-B   | A-B-B   | A-A-C   | A-C-C   | A-B-C   | B-B-C   | B-C-C   |
|---------|-------|---------|---------|---------|---------|---------|---------|---------|---------|---------|---------|
|         | range | M (F%)  |
| A.B     | 0.75  | 0.03    |         |         | 0.44    | 0.28    |         |         |         |         |         |
|         | 0-3   | (3.3)   | -       | -       | (37.7)  | (26.23) | -       | -       | -       | -       | -       |
| A.C     | 0.86  | 0.23    |         | 0.10    |         |         | 0.32    | 0.23    |         |         |         |
|         | 0-3   | (22.73) | -       | (9.09)  | -       | -       | (27.27) | (22.73) | -       | -       | -       |
| B.C     | 0.65  |         | 0.03    | 0.10    |         |         |         |         |         | 0.25    | 0.27    |
|         | 0-3   | -       | (3.3)   | (10)    | -       | -       | -       | -       | -       | (23.33) | (23.33) |
| A.C.B   | 0.41  |         |         |         |         | 0.05    | 0.14    | 0.05    | 0.18    |         |         |
|         | 0-1   | -       | -       | -       | -       | (4.55)  | (13.64) | (4.55)  | (18.18) | -       | -       |
| BB.A    | 0.85  | 0.06    | 0.18    |         | 0.15    | 0.47    |         |         |         |         |         |
|         | 0-2   | (5.88)  | (17.65) | -       | (14.71) | (38.24) | -       | -       | -       | -       | -       |
| CC.A    | 0.44  |         |         | 0.12    |         |         | 0.06    | 0.26    |         |         |         |
|         | 0-1   | -       | -       | (11.76) | -       | -       | (5.88)  | (26.47) | -       | -       | -       |
| CC.B    | 0.80  |         |         | 0.20    |         |         |         |         |         |         | 0.60    |
|         | 0-2   | -       | -       | (10)    | -       | -       | -       | -       | -       | -       | (50)    |

M: means of trivalents for each type. (F %): frequency of PMCs with trivalents.
