# Supplementary material
Source: PubMed Central journal article supplement (PMC3389969)
Supplement: supp_112.140780_FigureS1.pdf [file supp_112.140780_FigureS1.pdf]

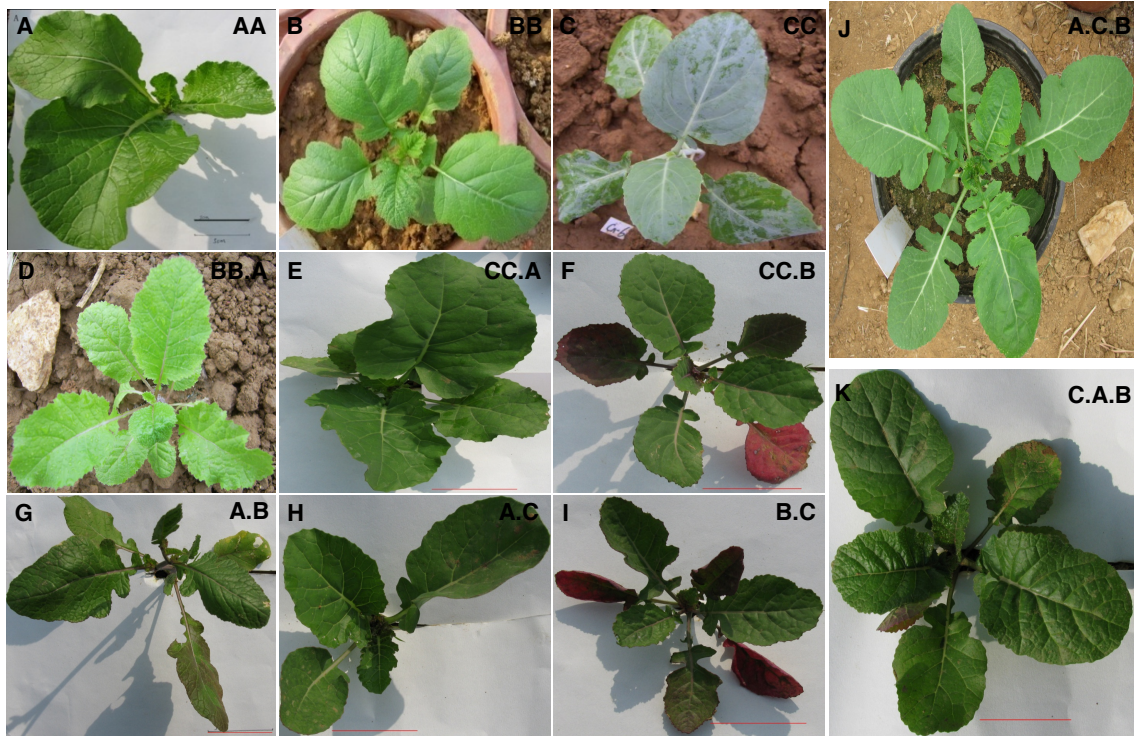

**FIGURE S1** Morphology of young hybrids and their progenitors (A-K). (A) *B. rapa* (3H120), genomes AA. (B) *B. nigra* cv. Giebra, BB. (C) *B. oleracea* var. *alboglabra* L. (ChiJielan), CC. (D) BB.A. (E) CC.A. (F) CC.B. (G) A.B. (H) A.C. (I) B.C. (J) A.C.B. (K) C.A.B. All bars, 5cm
