# Supplementary material
Source: PubMed Central journal article supplement (PMC3389969)
Supplement: supp_112.140780_TableS1.pdf [file supp_112.140780_TableS1.pdf]

**Table S1 Meiotic pairings in PMCs of hybrids at diakinesis and metaphase I by conventional method**

| Hybrids | Mean frequencies and Ranges |        |       |        |       |        | PMCs<br>with M<br>(%) | Total<br>PMCs | Pollen<br>fertility<br>(%) |
|---------|-----------------------------|--------|-------|--------|-------|--------|-----------------------|---------------|----------------------------|
|         | I                           |        | II    |        | III   |        |                       |               |                            |
|         | Means                       | Ranges | Means | Ranges | Means | Ranges |                       |               |                            |
| A.B     | 7.35                        | 2-16   | 4.01  | 0-8    | 0.45  | 0-2    | 44.1                  | 161           | 1.75                       |
| A.C     | 3.32                        | 1-11   | 7.51  | 4-9    | 0.22  | 0-1    | 21.95                 | 82            | 4.88                       |
| B.C     | 9.20                        | 7-15   | 1.78  | 1-5    | 0.56  | 0-2    | 60.18                 | 221           | 9.11                       |
| A.C.B   | 5.06                        | 1-18   | 10.12 | 0-13   | 0.57  | 0-3    | 55.68                 | 176           | -                          |
| BB.A    | 7.62                        | 4-12   | 8.40  | 2-10   | 0.50  | 0-2    | 45.28                 | 84            | 25.33                      |
| C.A.B   | 5.99                        | 1-11   | 9.74  | 0-12   | 0.51  | 0-1    | 50.83                 | 120           | -                          |
| CC.A    | 4.06                        | 0-13   | 11.41 | 6-14   | 0.38  | 0-1    | 37.67                 | 146           | 3.51                       |
| CC.B    | 6.49                        | 4 - 13 | 8.51  | 2 - 10 | 0.83  | 0-3    | 56.6                  | 53            | 17.56                      |

Univalent = I, bivalent = II, trivalent =III, M: multivalents
