# Supplementary material
Source: PubMed Central journal article supplement (PMC3389969)
Supplement: supp_112.140780_TableS2.pdf [file supp_112.140780_TableS2.pdf]

**Table S2 Means and percentages of trivalents per cell at metaphase I in hybrids revealed by FISH**

| Hybrids | Total | A-A-A   | B-B-B   | C-C-C   | A-A-B   | A-B-B   | A-A-C   | A-C-C   | A-B-C   | B-B-C   | B-C-C   |
|---------|-------|---------|---------|---------|---------|---------|---------|---------|---------|---------|---------|
|         | range | M (F%)  |
| A.B     | 0.75  | 0.03    |         |         | 0.44    | 0.28    |         |         |         |         |         |
|         | 0-3   | (3.3)   | -       | -       | (37.7)  | (26.23) | -       | -       | -       | -       | -       |
| A.C     | 0.86  | 0.23    |         | 0.10    |         |         | 0.32    | 0.23    |         |         |         |
|         | 0-3   | (22.73) | -       | (9.09)  | -       | -       | (27.27) | (22.73) | -       | -       | -       |
| B.C     | 0.65  |         | 0.03    | 0.10    |         |         |         |         |         | 0.25    | 0.27    |
|         | 0-3   | -       | (3.3)   | (10)    | -       | -       | -       | -       | -       | (23.33) | (23.33) |
| A.C.B   | 0.41  |         |         |         |         | 0.05    | 0.14    | 0.05    | 0.18    |         |         |
|         | 0-1   | -       | -       | -       | -       | (4.55)  | (13.64) | (4.55)  | (18.18) | -       | -       |
| BB.A    | 0.85  | 0.06    | 0.18    |         | 0.15    | 0.47    |         |         |         |         |         |
|         | 0-2   | (5.88)  | (17.65) | -       | (14.71) | (38.24) | -       | -       | -       | -       | -       |
| CC.A    | 0.44  |         |         | 0.12    |         |         | 0.06    | 0.26    |         |         |         |
|         | 0-1   | -       | -       | (11.76) | -       | -       | (5.88)  | (26.47) | -       | -       | -       |
| CC.B    | 0.80  |         |         | 0.20    |         |         |         |         |         |         | 0.60    |
|         | 0-2   | -       | -       | (10)    | -       | -       | -       | -       | -       | -       | (50)    |

M: means of trivalents for each type. (F %): frequency of PMCs with trivalents.
